# Supplementary material for: Comparison of College Students’ Energy Expenditure, Physical Activity, and Enjoyment during Exergaming and Traditional Exercise
Source: J Clin Med. 2018 Nov 10;7(11):433. doi: 10.3390/jcm7110433 (PMC6262538; doi:10.3390/jcm7110433)
Supplement: Supplementary file 1 [file jcm-07-00433-s001.xlsx]

## Sheet: Sheet1
Part. No.	Gender	Height	Weight	Start point	BFPerc	WaistCirc	PrevExerExp	PrevExerExp2	Just Dance	DAN_BPSys_BF	DAN_BPDia_BF	DAN_BPSys_AF	DAN_BPDia_AF	DAN_RPE0	DAN_RPE4	DAN_RPE8	DAN_RPE12	DAN_RPE16	DAN_RPE20	DAN_EnjSE1	DAN_EnjSE2	DAN_EnjSE3	DAN_EnjSE4	DAN_EnjSE5	DAN_EnjSE6	DAN_EnjSE7	DAN_EnjSE8	DAN_CALS	DAN_CALSPerDay	DAN_CALSPerHour	DAN_LPATime		DAN_METs	Reflex Ridge	RR_BPSys_BF	RR_BPDia_BF	RR_BPSys_AF	RR_BPDia_AF	RR_RPE0	RR_RPE4	RR_RPE8	RR_RPE12	RR_RPE16	RR_RPE20	RR_EnjSE1	RR_EnjSE2	RR_EnjSE3	RR_EnjSE4	RR_EnjSE5
1	2	174.5	72.9	Not available	24.8	82.5				137	81	147	77	7	9	10	12	16	11	4	3	4	2	4	4	4	5	68.457	68.457	68.457	68.457		2.547		141	74	138	71	7	11	12	13	12	13	4	3	4	1	4
2	2	159	60	Reflex Ridge	24.2	74	1	5		100	65	122	68	6	8	9	11	13	14	5	5	5	1	5	5	5	5	183.836	183.836	183.836	183.836		6.176		105	62	129	71	6	8	11	12	11	14	4	4	4	2	4
3	1	176	69.8	Treadmill	16.1	82	2			126	82	129	87	6	11	13	13	13	14	4	1	4	2	4	2	5	4	107.145	107.145	107.145	107.145		3.422		134	87	171	98	6	12	13	12	14	16	2	1	2	1	3
4	1	192	131.8	Dance	23.9	110				137	75	149	96	6	8	14	17	16	14	4	3	5	2	5	5	5	5	245.14	245.14	122.57	122.57		5.23		146	87	145	78	6	10	12	15	15	16	2	1	1	3	2
5	1	172.5	71.4	NA	16.1	81.5	1	2		149	81	158	96	6	7	9	11	14	15	3	2	2	4	4	2	2	2	143.272	143.272	143.272	143.272		6.101		138	96	163	87	6	6	8	11	15	16	2	1	3	4	2
6	2	173	65.2	NA	29.8	78	1	3		104	78	125	78	6	12	13	13	14	13	5	3	5	2	3	5	5	5	161.055	161.055	161.055	161.055		6.921		138	90	144	81	6	13	16	17	17	18	5	2	4	2	3
7	2	170	56.9	Reflex Ridge	18.9	67	1	5		97	68	135	98	9	10	10	19	9	9	4	5	5	1	5	5	5	5	47.46	47.46	23.73	23.73		1.62		95	56	109	68	6	8	8	9	8	8	4	2	3	1	4
8	1	179	70.3	Dance	8.9	75.5	1	4		110	61	114	71	6	10	12	13	15	16	3	3	1	3	3	2	4	4	83.307	83.307	41.654	41.654		2.698		118	65	127	70	6	13	16	15	14	15	2	2	3	3	2
9	1	176.5	67.9	Treadmill	6.8	77.5	2			135	86	150	86	6	7	7	8	9	10	4	4	4	2	3	2	4	3	112.053	112.053	112.053	112.053		3.639		131	89	135	64	6	7	10	9	10	11	4	5	5	2	3
10	2	172.5	56.9	Dance	17.3	69	2			111	74	133	74	6	9	11	11	12	12	2	2	4	1	5	4	4	4	88.242	88.242	88.242	88.242		3.816		117	71	109	86	6	12	11	12	13	12	2	1	2	4	4
11	1	174.5	61.7	Dance	6.8	78.5	1	2		121	69	154	88	6	9	11	12	14	15	3	1	4	5	1	1	3	2	148.297	148.297	148.297	148.297		5.559		113	88	135	78	7	9	12	13	16	16	2	1	2	3	3
12	1	175	65.6	Treadmill	18.7	87.5	1	4		117	63	134	65	8	12	14	16	16	18	5	5	4	3	4	5	5	5	88.102	88.102	44.051	44.051		2.964		95	74	143	116	7	12	15	15	16	16	4	4	5	1	4
91	2	162	59	Treadmill	27.2	71	1	3		91	46	97	67	6	6	6	6	6	6	5	3	5	2	4	4	5	4	77.555	77.555	77.555	77.555		2.695		104	61	96	45	6	6	7	7	8	12	4	3	5	4	4
14	1	164	60.3	Treadmill	12.1	79	1	2		136	64	125	66	6	10	10	10	10	10	4	2	2	4	4	2	4	2	44.509	44.509	22.255	22.255		2.179		136	71	128	69	6	10	11	12	11	10	4	2	4	2	4
15	2	168.5	101.5	Reflex Ridge	47.1	113	1	3		108	71	109	69	7	8	9	8	9	9	4	3	4	2	3	4	4	3	139.291	139.291	139.291	139.291		2.897		111	72	131	77	6	8	10	13	15	16	4	3	4	2	3
16	1	164.5	61.7	Treadmill	21.8	86.5	2	1		115	74	132	73	7	8	9	9	9	8	4	1	1	2	1	5	2	1	155.422	155.422	155.422	155.422		2.967		113	69	132	52	6	10	11	10	11	12	2	1	4	4	3
17	2	156	48.6	Reflex Ridge	22	69	1	2		98	63	95	67	6	6	7	7	7	7	5	4	3	2	3	4	3	3	16.839	16.839	8.42	8.42		1.19		97	61	106	72	6	8	9	11	12	11	4	2	3	3	3
18	2	165	74.1	Treadmill	35	87.5	1	2		119	90	137	81	6	7	7	6	6	8	1	1	1	5	1	1	1	1	184.126	184.126	184.126	184.126		3.244		120	81	135	88	6	9	10	9	11	12	5	3	4	2	4
13	1	186.5	73.5	Reflex Ridge	14.3	86	1	2		131	77	146	80	7	10	11	11	11	11	4	2	5	2	3	4	5	4	73.78	73.78	73.78	73.78		2.435		124	75	178	83	7	10	12	14	14	16	2	1	4	1	3
20	1	179	71.1	NA	11.5	82	1	3		111	65	135	67	6	8	9	8	9	8	1	1	1	3	3	5	5	5	166.763	166.763	166.763	166.763		5.753		120	64	161	71	6	9	11	14	16	15	4	2	3	2	3
21	1	172	81.9	Treadmill	18.6	89.5	2			123	82	141	78	6	7	9	10	10	10	5	2	4	4	3	4	4	4	111.084	111.084	111.084	111.084		2.749		140	88	94	67	6	7	8	9	9	10	4	3	4	2	3
22	1	189.5	83.1	Reflex Ridge	15.2	83.5	1	3		116	75	131	65	6	6	8	8	8	8	2	1	2	5	4	1	1	1	124.325	124.325	124.325	124.325		4.447		118	72	122	89	6	10	12	10	10	15	4	3	2	1	3
23	2	165.5	56.8	Treadmill	21.9	69	1	4		111	67	105	56	6	8	8	7	8	8	4	2	4	2	3	2	2	2	28.998	28.998	14.499	14.499		1.71		107	60	108	65	6	8	9	9	9	8	2	2	2	2	2
24	1	173.5	62.4	Treadmill	9.9	76	1	3		140	89	162	86	7	12	12	12	13	15	4	2	4	3	2	1	2	2	113.814	113.814	113.814	113.814		4.349		140	82	169	100	7	13	15	16	18	18	4	2	3	2	2
25	2	167	62.4	Reflex Ridge	18.8	72	1	3		106	88	110	81	6	7	8	8	9	10	5	3	4	2	5	5	5	5	49.806	49.806	49.806	49.806		1.495		105	58	114	72	6	7	8	10	9	12	2	4	3	1	3
26	1	177	75.8	Treadmill	13.9	83	1	3		128	70	129	75	6	7	7	7	8	8	3	2	3	4	3	2	4	2	73.31	73.31	73.31	73.31		2.562		130	83	127	73	6	8	10	10	10	10	4	2	4	2	4
27	2	167.5	61.6	Reflex Ridge	21.1	70	1	3		100	66	106	65	6	8	8	8	7	8	3	3	4	4	3	4	3	4	WAIST DATA NOT FOUND!!!			#VALUE!				107	66	140	71	6	8	10	9	9	12	4	3	4	2	3
28	2	172.5	60.7	Treadmill	22.4	69	1	4		103	65	127	71	8	14	14	16	15	16	3	4	2	4	2	3	5	4	108.019	108.019	54.01	54.01		3.709		108	63	126	65	8	14	18	17	18	17	5	4	4	1	3
29	2	173	66.8	Treadmill	28.6	76.5	1	3		100	84	122	71	6	12	12	11	10	11	2	3	3	2	4	4	4	4	125.398	125.398	125.398	125.398		3.654		105	70	122	75	6	7	10	11	11	12	2	3	4	2	4
30	2	180	80.3	Reflex Ridge	33	80.5	1	4		134	88	131	83	6	8	10	10	11	11	4	4	4	2	4	4	4	4	75.174	75.174	37.587	37.587		2.052		120	73	123	86	6	8	9	11	12	12	2	2	4	2	4
31	2	155	64.4	Treadmill	31	81	1	3		110	70	108	71	6	6	7	8	8	10	5	4	5	2	5	5	5	5	45.445	45.445	45.445	45.445		1.901		106	75	94	62	6	9	10	11	12	10	1	1	1	4	2
32	1	186.5	74.9	Treadmill	14	82	1	3		117	74	124	78	6	6	7	8	8	9	5	5	5	2	5	4	4	5	WAIST DATA NOT FOUND!!!			#VALUE!				106	67	113	67	6	6	6	7	7	8	4	2	2	1	4
33	1	176	74.9	Dance	25.8	91	1	3		122	82	142	92	6	6	7	8	8	9	2	1	3	1	5	4	4	2	101.103	101.103	101.103	101.103		3.642		122	78	147	82	6	7	11	11	12	15	4	2	4	1	3
34	1	175.5	68.1	Reflex Ridge	8.4	86	1	2		128	65	141	64	8	9	11	13	15	16	3	2	3	2	4	5	5	5	115.685	115.685	57.843	57.843		4.533		120	69	142	78	6	6	8	11	14	15	4	2	3	2	2
35	2	173.5	65.6	Treadmill	30.7	77		4		115	73	113	74	7	8	9	10	11	12	4	5	5	1	4	5	5	5	139.551	139.551	139.551	139.551		4.087		100	63	110	64	6	7	9	10	12	13	2	2	2	4	2
36	2	169	66.2	Reflex Ridge	27.4	71.5	1	3		110	79	125	79	6	10	11	10	11	10	5	4	5	1	4	4	5	5	81.292	81.292	40.646	40.646		2.462		107	75	125	80	6	7	8	9	9	11	4	2	4	1	3
37	1	178	92.8	Dance	21.7	93	2			138	80	164	90	6	6	8	8	8	8	2	1	1	3	4	2	4	4	WAIST DATA NOT FOUND!!!			#VALUE!				157	96	162	87	6	9	9	10	10	15	1	1	1	3	1
38	2	162	55	NA	24.1	79	2			103	65	107	67	6	10	13	14	16	14	4	3	4	2	4	3	4	4	71.759	71.759	71.759	71.759		2.783		161				6	6	8	11	14	15	4	3	4	2	4
39	2	172	57.9	Reflex Ridge	23.7	68	1	3		119	80	100	69	7	11	11	11	11	12	4	2	4	2	4	4	5	5	29.449	29.449	14.725	14.725		1.201		121	76	126	84	7	13	14	15	14	15	4	2	4	2	4
40	1	168.5	72.7	Treadmill	9.7	78	1	3		151	78	161	84	7	11	13	13	12	14	5	4	5	3	4	4	4	4	129.937	129.937	129.937	129.937		4.87		148	84	186	85	7	9	11	10	11	12	4	3	4	4	4
41	1	170	78.3	Treadmill	19.6	86	1	2		137	80	143	72	6	9	10	11	11	11	4	4	4	3	3	3	4	2	88.369	88.369	88.369	88.369		2.74		124	69	136	72	6	8	10	10	12	12	2	2	4	4	3
42	2	159.5	54.6	Reflex Ridge	18.1	70	1	1		105	68	106	65	6	7	8	7	7	7	2	2	2	4	2	2	2	2	8.291	8.291	4.146	4.146		1.114		96	53	112	66	6	8	9	9	10	9	3	2	2	4	2
43	2	162.5	63.5	Reflex Ridge	27.5	80.5	1	4		97	66	122	57	11	7	10	10	11	11	3	4	4	4	4	5	5	5	98.011	98.011	49.006	49.006		3.284		101	64	128	67	6	6	8	9	9	13	4	5	4	1	4
44	1	171	66.4	Treadmill	11.7	73	1	3		111	61	118	76	6	9	10	12	12	12	2	1	1	4	1	2	2	2	81.112	81.112	40.556	40.556		2.732		118	63	133	67	6	12	14	15	15	16	5	1	2	2	1
45	2	171	63.8	Treadmill	27.2	75	1	3		112	64	125	56	6	7	7	8	8	8	4	3	4	2	4	3	4	4	97.595	97.595	97.595	97.595		2.871		119	70	132	73	6	7	7	8	8	8	4	2	4	2	4
46	2	169	63.2	Reflex Ridge	26.1	71	1	2		122	59	114	71	6	7	8	8	8	8	2	2	2	4	4	2	2	2	61.72	61.72	30.86	30.86		1.894		106	57	158	77	6	8	8	8	8	8	4	3	2	3	2
47	2	164.5	68.4	Reflex Ridge	27	83	1	3		116	69	132	60	6	7	10	10	10	11	4	1	2	2	1	4	4	4	107.918	107.918	107.918	107.918		3.706		127	74	147	77	6	11	12	12	14	13	4	1	4	1	3
48	2	162.5	65.2	Treadmill	32.2	77	1	2		133	86	163	87	6	10	11	13	14	15	5	5	5	1	3	4	4	4	108.244	108.244	108.244	108.244		3.304		127	81	139	88	7	10	10	10	11	10	1	1	1	2	2
49	1	182	90.9	Reflex Ridge	15.1	86	1	3		99	61	101	64	7	10	11	12	13	15	5	4	5	2	4	4	5	4	122.842	122.842	61.421	61.421		3.857		131	74	127	70	6	9	11	13	13	14	5	4	5	1	4
50	2	170	65.9	Dance	26.1	77	1	3		119	67	113	65	6	6	7	6	7	7	4	4	4	3	4	4	4	2	32.488	32.488	32.488	32.488		1.395		117	64	121	70	6	7	7	8	8	8	5	4	4	1	4
51	1	175.5	114.5	Treadmill	31.3	108.5	1	3		152	95	159	84	6	7	8	9	10	7	4	2	4	4	3	3	4	4	156.574	156.574	156.574	156.574		3.723		162	88	154	85	6	8	9	9	9	11	4	2	4	1	3
52	1	171	77.5	Dance	17.8	85.5	1	3		121	71	119	79	7	8	7	10	9	9	3	2	4	3	5	5	5	4	122.285	122.285	61.143	61.143		4.273		123	77	122	66	6	9	10	9	9	10	2	2	4	2	4
53	1	182	76	Reflex Ridge	15.7	81.5	1	2		126	90	126	90	6	6	6	6	6	6	2	2	2	5	2	1	1	1	81.396	81.396	40.698	40.698		2.622		132	85	138	89	6	10	12	14	15	16	4	3	4	1	4
54	1	176	112.5	Treadmill	29.2	108.5	1	3		118	77	128	71	7	9	11	12	13	13	5	4	5	1	5	5	5	5	152.47	152.47	152.47	152.47		3.767		132	65	117	72	6	7	8	9	9	9	1	1	1	4	4
55	2	161.5	69.8	Reflex Ridge	33.2	76	2			109	69	124	79	7	7	8	8	9	9	4	2	3	2	3	2	4	4	44.07	44.07	22.035	22.035		1.777		115	78	125	78	6	7	9	10	12	12	4	3	4	1	2
56	2	167	55.4	Reflex Ridge	23.2	68	1	4		114	74	124	75	6	10	10	9	9	9	4	3	4	2	3	4	4	4	56.5	56.5	28.25	28.25		1.964		112	71	130	76	6	12	12	12	12	12	4	3	3	1	4
57	1	165	60.7	Dance	14.1	74	1	3		138	92	128	77	9	10	10	10	11	11	2	2	2	4	2	1	4	1	2.185	2.185	2.185	2.185		1		124	81	155	99	8	9	9	9	11	11	4	4	4	2	4
58	2	160.5	55	Reflex Ridge	30.8	76	2			88	71	104	69	7	7	8	9	11	11	5	5	4	3	4	4	4	4	134.077	134.077	134.077	134.077		5.164		100	69	103	71	6	7	7	8	10	12	4	4	3	4	4
59	1	185.5	68.9	Reflex Ridge	7.3	75	1	3		120	75	125	76	6	11	11	10	11	9	4	3	4	2	4	4	4	4	42.083	42.083	42.083	42.083		1.869		123	61	129	75	6	9	11	10	10	9	4	2	3	2	3
60	1	186.5	87.3	Dance	20.4	88	1	2		151	78	174	75	6	7	8	8	10	11	2	1	4	2	3	2	4	2	45.084	45.084	22.542	22.542		2.068		124	71	145	73	6	9	10	12	10	10	3	1	4	2	3
	1 is male																			1 = Strongly Disagree; 2 = Disagree; 3 = No Opinion; 4 = Agree; 5 = Strongly Agree																									1 = Strongly Disagree; 2 = Disagree; 3 = No Opinion; 4 = Agree; 5 = Strongly Agree
	2 is female
[truncated: 33 more columns]
